# Supplementary material for: Vulpinic acid contributes to the cytotoxicity of Pulveroboletus ravenelii to human cancer cells by inducing apoptosis
Source: Royal Society of Chemistry journal article supplement (doi:10.1039/c7ra05059c), 2017-01-01
Supplement: c7ra05059c1.pdf [file c7ra05059c1.pdf]

## SUPPLEMENTAL INFORMATION

### **Vulpinic acid contributes to the cytotoxicity of *Pulveroboletus ravenelii* to human cancer cells by inducing apoptosis**

Sil Kim, Hae Min So, Hyun-Soo Roh, Jin Kim, Jae Sik Yu, Seul Lee, Soonja Seok, Changhyun Pang, Kwan-Hyuck Baek, and Ki Hyun Kim

#### **Inventory of supplemental information**

**Supplemental Figure 1.** Representative bright-field images of human lung adenocarcinoma, pancreatic ductal adenocarcinoma and hepatocellular carcinoma cell lines treated with four different fractions prepared from the MeOH extract of *P. ravenelii*.

**Supplemental Figure 2.** Representative immunofluorescence images of TUNEL staining in human lung adenocarcinoma, pancreatic ductal adenocarcinoma and hepatocellular carcinoma cell lines treated with MeOH extract of *P. ravenelii* and its fractions.

**Supplemental Table 1.** IC<sub>50</sub> values (mg/ml) of four different fractions from the MeOH extract of *P. ravenelii* in human cancer cell lines.

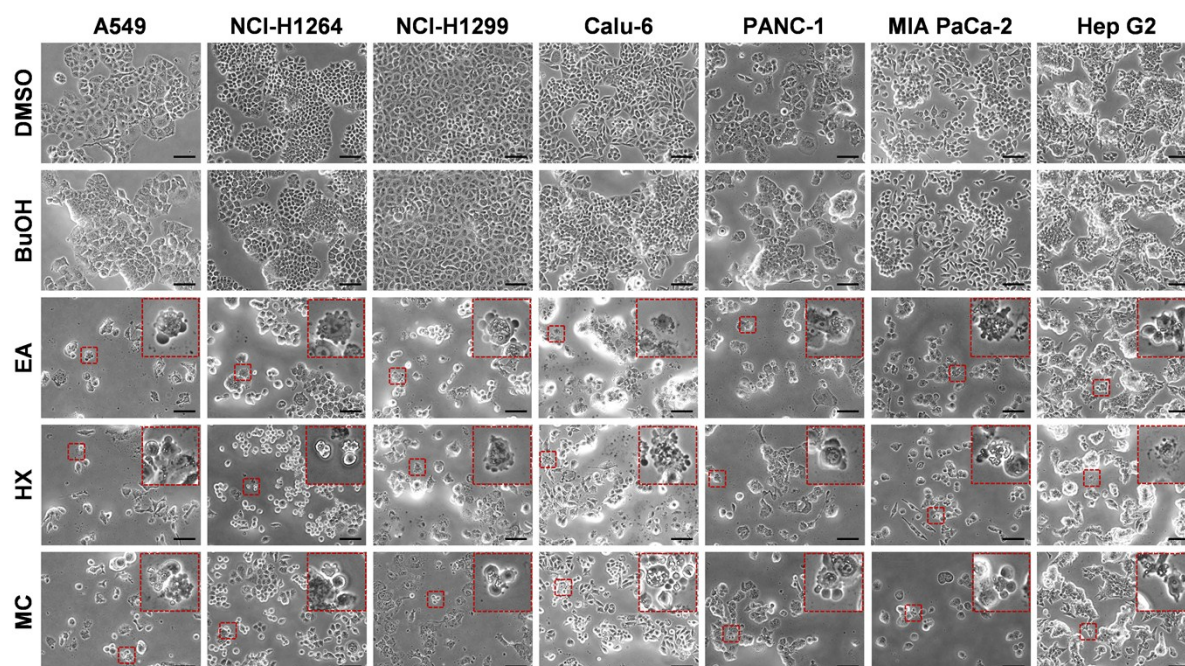

**Fig. S1.** Representative bright-field images of human lung adenocarcinoma, pancreatic ductal adenocarcinoma and hepatocellular carcinoma cell lines treated with four different fractions prepared from the *P. ravenelii* MeOH extract. The images were taken at 200 $\times$  total magnification from the human cancer cells treated with the indicated fractions of the MeOH extract *P. ravenelii* at 120  $\mu$ g/ml concentration or 0.12% DMSO in growth media as vehicle controls for 48hrs using a bright-field microscope. Magnified regions are shown as insets. Scale bar: 100  $\mu$ m.

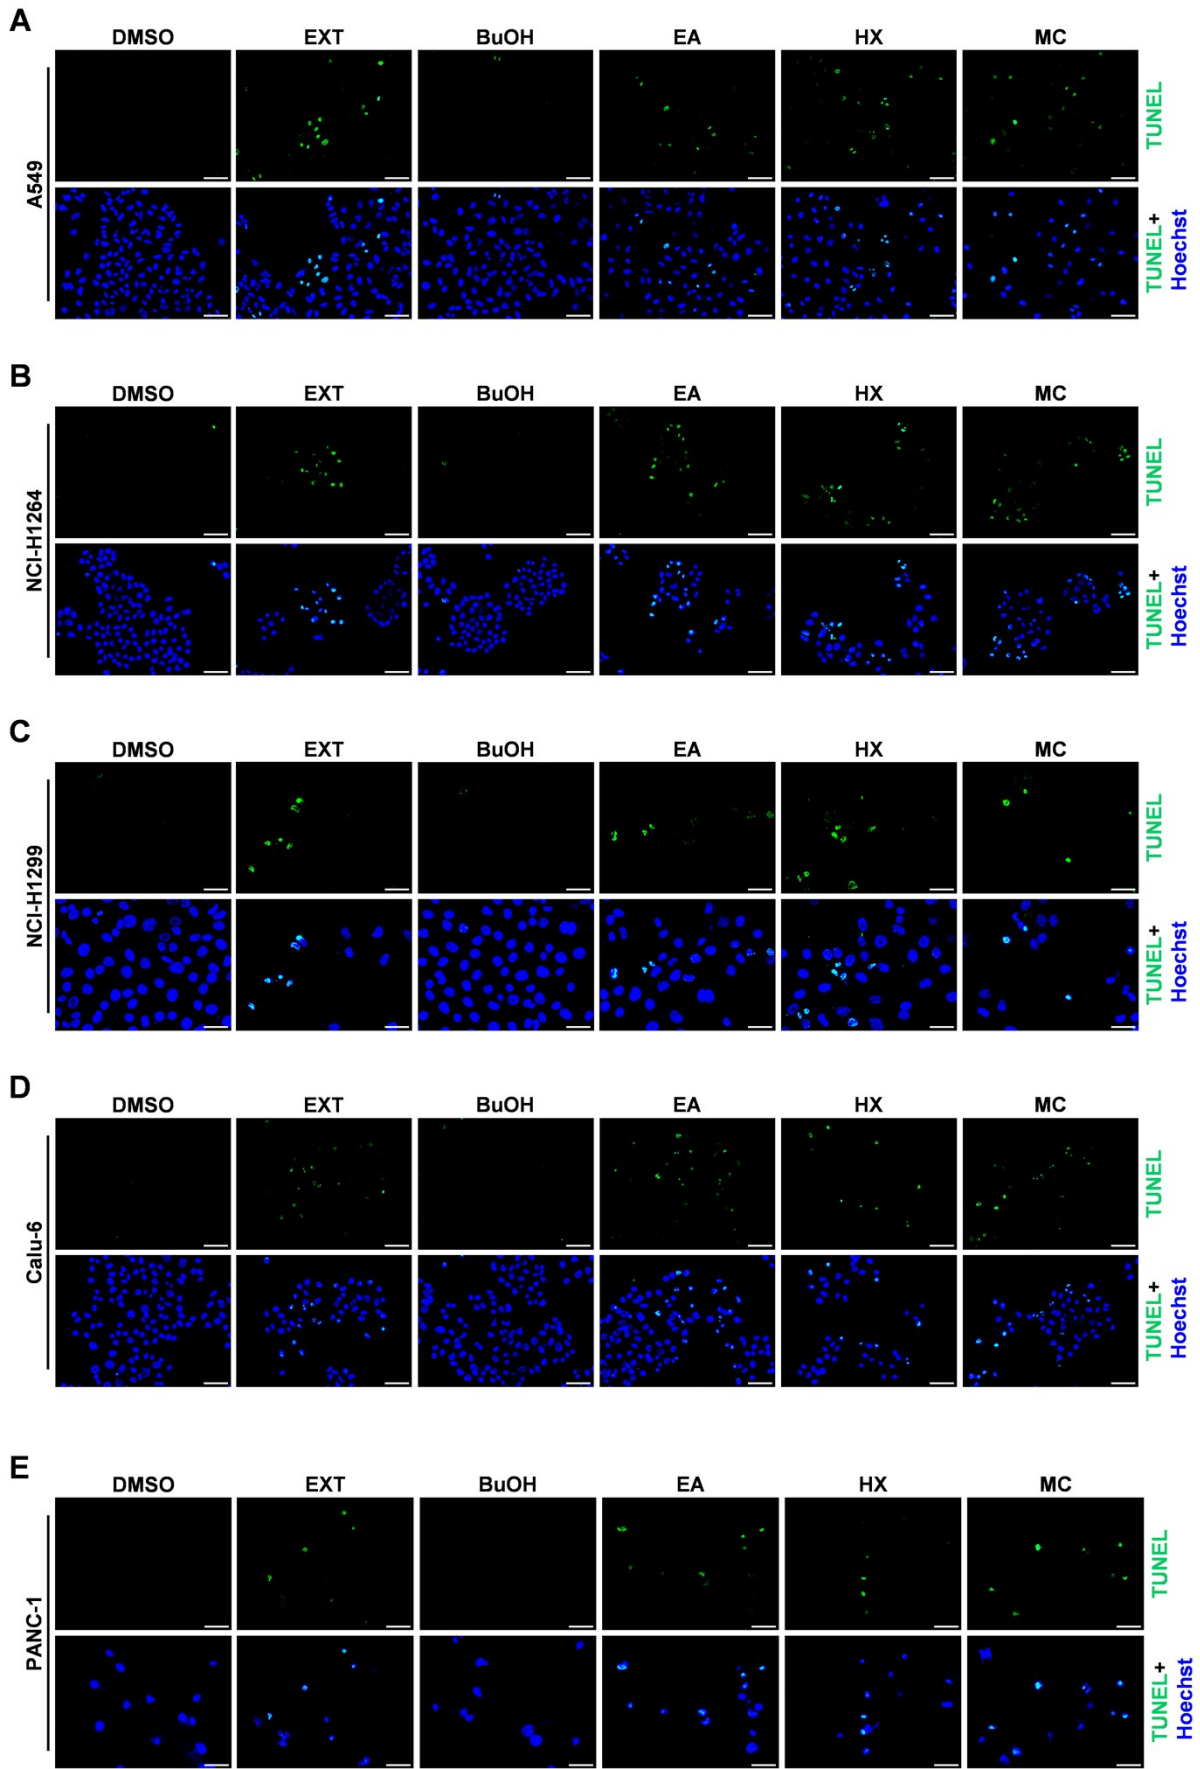

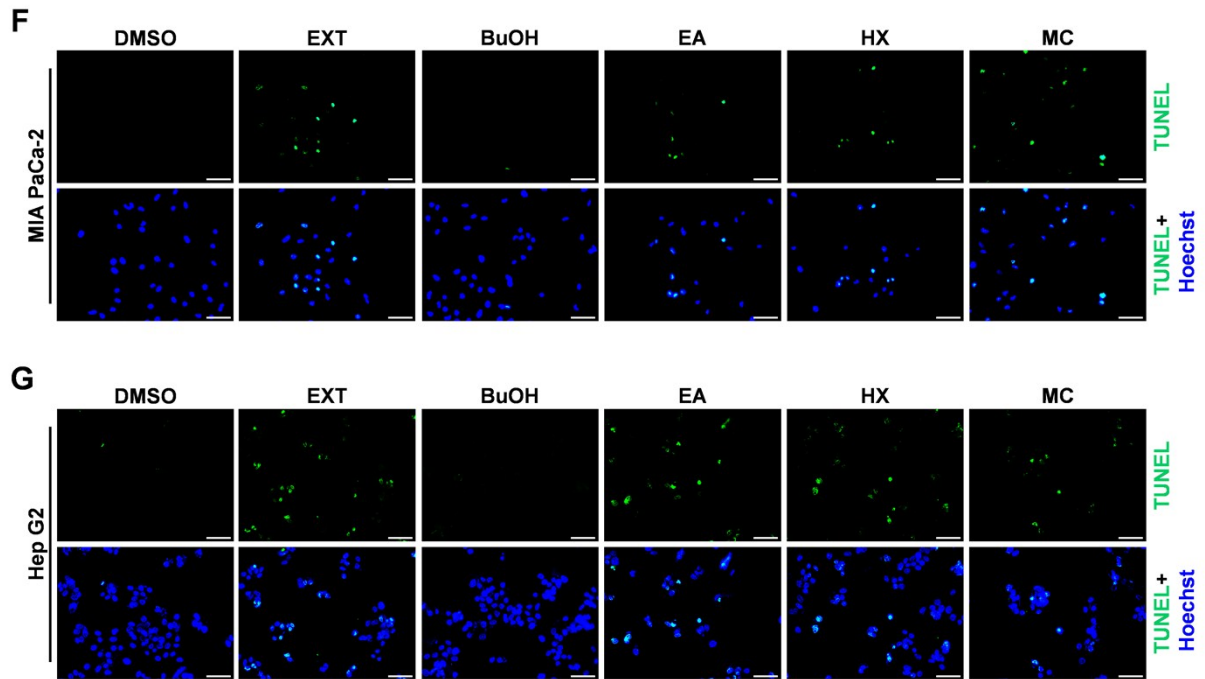

**Fig. S2.** Representative immunofluorescence images of TUNEL staining in human lung adenocarcinoma, pancreatic ductal adenocarcinoma and hepatocellular carcinoma cell lines treated with MeOH extract of *P. ravenelii* and its fractions. (A-G) Representative fluorescence images (400 $\times$  total magnification) of A549 (A), NCI-H1264 (B), NCI-H1299 (C), Calu-6 (D), PANC-1 (E), MIA PaCa-2 (F) and Hep G2 (G) cells stained for TUNEL (green) and Hoechst (blue) after treatment with the MeOH extract of *P. ravenelii* (EXT) and its fractions, EA, HX and MC, at IC<sub>50</sub> concentrations for 48 hrs. Cells treated with 0.15% DMSO in growth media or BuOH fraction at 150  $\mu$ g/ml were also stained for TUNEL as negative controls. Scale bar: 50  $\mu$ m.

**Table S1. IC<sub>50</sub> values (mg/ml) of four different fractions from the MeOH extract of *P. ravenelii* in human cancer cell lines.**

| Fraction | Human cancer cell lines |             |             |             |             |             |             |
|----------|-------------------------|-------------|-------------|-------------|-------------|-------------|-------------|
|          | A549                    | NCI-H1264   | NCI-H1299   | Calu-6      | PANC-1      | MIA PaCa-2  | Hep G2      |
| BuOH     | ND <sup>a</sup>         | ND          | ND          | ND          | ND          | ND          | ND          |
| EA       | 66.0 ± 0.1 <sup>b</sup> | 111.5 ± 0.9 | 91.7 ± 1.8  | 67.0 ± 3.0  | 104.6 ± 2.2 | 84.4 ± 1.3  | 146.2 ± 0.2 |
| HX       | 45.8 ± 3.0              | 39.6 ± 0.8  | 56.4 ± 1.2  | 60.8 ± 1.0  | 133.3 ± 6.3 | 40.4 ± 1.0  | 83.6 ± 1.6  |
| MC       | 95.3 ± 8.6              | 107.4 ± 2.6 | 131.6 ± 1.3 | 120.0 ± 0.8 | 148.6 ± 2.9 | 106.6 ± 1.5 | 131.3 ± 2.7 |

<sup>a</sup> ND, not determined.

<sup>b</sup> Values are the mean ± SEM of triplicate determinations.
